# Supplementary material for: Next-generation DNA sequencing of HEXA: a step in the right direction for carrier screening
Source: PubMed Central journal article supplement (PMC3865593; doi:10.1002/mgg3.37), 2013-09-16
Supplement: mgg30001-0260-SD1.pdf [file mgg30001-0260-SD1.pdf]

**Supp. Table S1. Data for individual study participants, including self-reported TS status, enzyme levels and interpretation, HexA variant(s) name(s) (if detected), and self-reported ethnicity**

| Patient number: | Self-reported TS status: | % Hex A activity: | Enzyme interpretation:         | HexA variant(s) names, cDNA and protein, if applicable: | Self-reported ethnicity:                   |
|-----------------|--------------------------|-------------------|--------------------------------|---------------------------------------------------------|--------------------------------------------|
| 1               | Affected - LOTS          | 8.6               | Affected - LOTS                | c.805G>A (p.Gly269Ser); c.1274_1277dupTATC              | Ashkenazi Jewish                           |
| 2               | Affected - LOTS          | 7.5               | Affected - LOTS                | c.805G>A (p.Gly269Ser); c.1274_1277dupTATC              | German/Russian                             |
| 3               | Affected - LOTS          | 6.2               | Affected - LOTS                | c.805G>A (p.Gly269Ser); c.1421+1G>C                     | Ashkenazi Jewish                           |
| 4               | Affected - LOTS          | 12.7              | Affected - LOTS                | c.805G>A (p.Gly269Ser); c.1510C>T (p.Arg504Cys)         | Polish/Dutch/Old English                   |
| 5               | Affected - LOTS          | 11.3              | Affected - LOTS                | c.805G>A (p.Gly269Ser); c.1510C>T (p.Arg504Cys)         | Ashkenazi Jewish/German                    |
| 6               | Carrier                  | 46.5              | Carrier                        | c.1274_1277dupTATC                                      | Ashkenazi Jewish                           |
| 7               | Carrier                  | 46.1              | Carrier                        | c.1274_1277dupTATC                                      | Ashkenazi Jewish                           |
| 8               | Carrier                  | 46.9              | Carrier                        | c.1274_1277dupTATC                                      | Ashkenazi Jewish                           |
| 9               | Carrier                  | 46.8              | Carrier                        | c.1274_1277dupTATC                                      | Ashkenazi Jewish                           |
| 10              | Carrier                  | 25.9              | Carrier                        | c.1274_1277dupTATC                                      | Ashkenazi Jewish                           |
| 11              | Carrier                  | 36.7              | Carrier                        | c.1274_1277dupTATC                                      | Ashkenazi Jewish                           |
| 12              | Not reported             | 47.5              | Carrier                        | c.1274_1277dupTATC                                      | Czechoslovakian                            |
| 13              | Carrier (obligate)       | 51.7              | Carrier                        | c.1274_1277dupTATC                                      | Ashkenazi Jewish/French Canadian/Ukrainian |
| 14              | Carrier (obligate)       | 33.3              | Carrier                        | c.1274_1277dupTATC                                      | Ashkenazi Jewish/Caucasian                 |
| 15              | Carrier (obligate)       | 46.7              | Carrier                        | c.1274_1277dupTATC                                      | Caucasian                                  |
| 16              | Carrier (obligate)       | 41.4              | Carrier                        | c.1274_1277dupTATC                                      | Caucasian                                  |
| 17              | Carrier (obligate)       | 50.7              | Carrier                        | c.1274_1277dupTATC                                      | Ashkenazi Jewish                           |
| 18              | Carrier (obligate)       | 35.6              | Carrier                        | c.1274_1277dupTATC                                      | Ashkenazi Jewish                           |
| 19              | Carrier (obligate)       | 35.3              | Carrier                        | c.1274_1277dupTATC                                      | Mediterranean/Irish/English/Slovakian      |
| 20              | Carrier (obligate)       | 48.1              | Carrier                        | c.1274_1277dupTATC                                      | Ashkenazi Jewish/Caucasian                 |
| 21              | Carrier (obligate)       | 39                | Carrier                        | c.1274_1277dupTATC                                      | Ashkenazi Jewish                           |
| 22              | Carrier (obligate)       | 39                | Carrier                        | c.1274_1277dupTATC                                      | Ashkenazi Jewish                           |
| 23              | Carrier (obligate)       | 47.4              | Carrier                        | c.1274_1277dupTATC                                      | Irish/English/Czechoslovakian              |
| 24              | Carrier (obligate)       | 29.4              | Inconclusive (High Total HexA) | c.1274_1277dupTATC                                      | Ashkenazi Jewish                           |
| 25              | Carrier                  | 50.4              | Carrier                        | c.1073+1G>A                                             | Hispanic/French Canadian/German            |
| 26              | Carrier                  | 41.4              | Carrier                        | c.1073+1G>A                                             | Caucasian                                  |
| 27              | Not reported             | 48                | Carrier                        | c.1073+1G>A                                             | Caucasian                                  |
| 28              | Carrier (obligate)       | 46.2              | Carrier                        | c.1073+1G>A                                             | Caucasian                                  |
| 29              | Carrier (obligate)       | 46.5              | Carrier                        | c.1073+1G>A                                             | Irish/Caucasian                            |
| 30              | Carrier (obligate)       | 44.4              | Carrier                        | c.1073+1G>A                                             | Caucasian                                  |
| 31              | Carrier (obligate)       | 39.9              | Carrier                        | c.1073+1G>A                                             | Italian/Irish                              |
| 32              | Carrier (obligate)       | 49.1              | Carrier                        | c.1073+1G>A                                             | Irish                                      |
| 33              | Carrier (obligate)       | 48.7              | Carrier                        | c.1421+1G>C                                             | Ashkenazi Jewish                           |
| 34              | Carrier (obligate)       | 36.6              | Carrier                        | c.1421+1G>C                                             | Ashkenazi Jewish                           |
| 35              | Carrier (obligate)       | 46.4              | Carrier                        | c.1421+1G>C                                             | Ashkenazi Jewish/Caucasian                 |
| 36              | Carrier (obligate)       | 34.6              | Carrier                        | c.1421+1G>C                                             | Ashkenazi Jewish                           |
| 37              | Carrier                  | 42.3              | Carrier                        | c.1393G>A (p.Asp465Asn)                                 | Caucasian                                  |
| 38              | Carrier (obligate)       | 50.8              | Carrier                        | c.1393G>A (p.Asp465Asn)                                 | Caucasian                                  |
| 39              | Carrier (obligate)       | 45.7              | Carrier                        | c.1393G>A (p.Asp465Asn)                                 | Caucasian                                  |
| 40              | Carrier (obligate)       | 44.3              | Carrier                        | c.1510C>T (p.Arg504Cys)                                 | Dutch/English                              |

|    |                                   |      |                                |                         |                                   |
|----|-----------------------------------|------|--------------------------------|-------------------------|-----------------------------------|
| 41 | Carrier (obligate)                | 49.4 | Carrier                        | c.1510C>T (p.Arg504Cys) | Caucasian                         |
| 42 | Carrier (obligate)                | 48.8 | Carrier                        | c.965A>T (p.Asp322Val)  | French Canadian/Irish             |
| 43 | Carrier (obligate)                | 31.6 | Carrier                        | c.965A>T (p.Asp322Val)  | French Canadian/Irish             |
| 44 | Carrier                           | 44.6 | Carrier                        | c.805G>A (p.Gly269Ser)  | Slovakian/Polish/Eastern European |
| 45 | Carrier (obligate)                | 45.8 | Carrier                        | c.805G>A (p.Gly269Ser)  | Ashkenazi Jewish                  |
| 46 | Carrier                           | 47.8 | Carrier                        | c.775A>G (p.Thr259Ala)  | Caucasian                         |
| 47 | Carrier (obligate)                | 48   | Carrier                        | c.775A>G (p.Thr259Ala)  | Caucasian                         |
| 48 | Carrier (obligate)                | 62.4 | Non-carrier                    | c.533G>A (p.Arg178His)  | Italian/Polish                    |
| 49 | Carrier (obligate)                | 60.9 | Non-carrier                    | c.533G>A (p.Arg178His)  | Hispanic                          |
| 50 | Carrier (obligate)                | 32.2 | Carrier                        | del 7.6kb               | French Canadian                   |
| 51 | Carrier (obligate)                | 66.8 | Inconclusive (Low Total HexA)  | c.1496G>A (p.Arg499His) | Irish/Caucasian                   |
| 52 | Carrier (obligate)                | 46.5 | Carrier                        | c.927_928delCT          | Mediterranean/Irish/Swedish       |
| 53 | Carrier (pseudodeficiency allele) | 51   | Carrier                        | c.739C>T (p.Arg247Trp)  | Ashkenazi Jewish                  |
| 54 | Carrier (obligate)                | 32.4 | Inconclusive (High Total HexA) | c.459+5G>A              | Hispanic                          |
| 55 | Carrier (obligate)                | 52.8 | Carrier                        | c.118delT               | Irish/mixed European              |
| 56 | Not reported                      | 32.3 | Carrier                        | c.110A>G (p.Tyr37Cys)   | Polish                            |
| 57 | Non-carrier                       | 39.2 | Inconclusive (High Total HexA) | no mutation detected    | Caucasian                         |
| 58 | Non-carrier                       | 65   | Non-carrier                    | no mutation detected    | Caucasian                         |
| 59 | Non-carrier                       | 64.6 | Non-carrier                    | no mutation detected    | Caucasian                         |
| 60 | Non-carrier                       | 60.1 | Non-carrier                    | no mutation detected    | Ashkenazi Jewish                  |
| 61 | Non-carrier                       | 65.5 | Non-carrier                    | no mutation detected    | Caucasian                         |
| 62 | Non-carrier                       | 66.3 | Non-carrier                    | no mutation detected    | Hispanic                          |
| 63 | Non-carrier                       | 73   | Non-carrier                    | no mutation detected    | Ashkenazi Jewish/Caucasian        |
| 64 | Non-carrier                       | 64.6 | Non-carrier                    | no mutation detected    | Caucasian                         |
| 65 | Not reported                      | 58.2 | Inconclusive                   | no mutation detected    | Ashkenazi Jewish                  |
| 66 | Not reported                      | 53.2 | Inconclusive                   | no mutation detected    | Indian/French Canadian/Caucasian  |
| 67 | Not reported                      | 57.4 | Inconclusive                   | no mutation detected    | French Canadian/Caucasian         |
| 68 | Not reported                      | 62   | Non-carrier                    | no mutation detected    | Caucasian                         |
| 69 | Not reported                      | 61.4 | Non-carrier                    | no mutation detected    | African American/Native American  |
| 70 | Not reported                      | 60.5 | Non-carrier                    | no mutation detected    | African American                  |
| 71 | Not reported                      | 69.5 | Non-carrier                    | no mutation detected    | Native American/Caucasian         |
| 72 | Not reported                      | 61.1 | Non-carrier                    | no mutation detected    | Ashkenazi Jewish                  |
| 73 | Sandhoff                          | 74.4 | Non-carrier (Sandhoff)         | no mutation detected    | Caucasian                         |
| 74 | Sandhoff                          | 80.7 | Non-carrier (Sandhoff)         | no mutation detected    | French Canadian/Irish/Caucasian   |

Participants with HexA enzymatic activity in the ~36-52% range were classified as carriers, while those in the ~60-73% range were considered to be non-carriers, and those in the ~76-85% range were classified as Sandhoff (evaluated in the context of the total Hex activity as well). HGVS-approved variant nomenclature was used. GenBank accession number NM\_000520.4.
